1 **Persistence of SARS CoV-2 S1 Protein in CD16+ Monocytes**  
2 **in Post-Acute Sequelae of COVID-19 (PASC) Up to 15 Months**  
3 **Post-Infection**

4 Summary: SARS CoV-2 S1 protein in CD16+ monocytes in the absence of full-length  
5 RNA in patients with PASC up to 15 months post-infection

6 Bruce K. Patterson<sup>1</sup>, Edgar B. Francisco<sup>1</sup>, Ram Yogendra<sup>2</sup>, Emily Long<sup>1</sup>, Amruta Pise<sup>1</sup>, Hallison  
7 Rodrigues<sup>1</sup>, Eric Hall<sup>3</sup>, Monica Herrera<sup>3</sup>, Purvi Parikh<sup>4</sup>, Jose Guevara-Coto<sup>5,6</sup>, Timothy J.  
8 Triche<sup>7</sup>, Paul Scott<sup>7</sup>, Saboor Hekmati<sup>7</sup>, Dennis Maglinte<sup>7</sup>, Xaiolan Chang<sup>8</sup>, Rodrigo A Mora-  
9 Rodríguez<sup>5</sup>, Javier Mora<sup>5</sup>

10

11

12 <sup>1</sup>IncellDx Inc, San Carlos, CA

13 <sup>2</sup>Lawrence General Hospital, Lawrence, MA

14 <sup>3</sup>Bio-Rad Laboratories, Hercules, CA

15 <sup>4</sup>NYU Langone Health, New York, NY

16 <sup>5</sup>Lab of Tumor Chemosensitivity, CIET / DC Lab, Faculty of Microbiology, Universidad  
17 de Costa Rica

18 <sup>6</sup>Department of Computer Science and Informatics (ECCI), Universidad de Costa Rica,  
19 San Jose, Costa Rica

20 <sup>7</sup>Avrok Laboratories, Inc., Azusa, CA

21 <sup>8</sup> Vaccine & Gene Therapy Institute and Oregon National Primate Research Center,  
22 Oregon Health & Science University, Portland, OR, USA

23

24

25 Summary: SARS CoV-2 S1 Protein in CD16+ Monocytes In PASC

26

27

28 Corresponding author:

29 Bruce K. Patterson MD

30 1541 Industrial Road

31 San Carlos, CA 94070

32 Tel: +1.650.777.7630

33 Fax: +1.650.587.1528

34 Email: [brucep@incelldx.com](mailto:brucep@incelldx.com)

35

36 **Key words:**

37

38 COVID-19, PASC, SARS CoV-2 S1 protein, non-classical monocytes, CCR5, fractalkine

39

40

41

42

43

44  
45  
46  
47  
48  
49  
50  
51  
52  
53  
54  
55  
56  
57  
58  
59  
60  
61  
62  
63  
64  
65  
66  
67  
68  
69  
70  
71  
72  
73  
74  
75  
76  
77  
78  
79  
80  
81  
82  
83  
84  
85  
86  
87

## ABSTRACT

The recent COVID-19 pandemic is a treatment challenge in the acute infection stage but the recognition of chronic COVID-19 symptoms termed post-acute sequelae SARS-CoV-2 infection (PASC) may affect up to 30% of all infected individuals. The underlying mechanism and source of this distinct immunologic condition three months or more after initial infection remains elusive. Here, we investigated the presence of SARS-CoV-2 S1 protein in 46 individuals. We analyzed T-cell, B-cell, and monocytic subsets in both severe COVID-19 patients and in patients with post-acute sequelae of COVID-19 (PASC). The levels of both intermediate (CD14+, CD16+) and non-classical monocyte (CD14Lo, CD16+) were significantly elevated in PASC patients up to 15 months post-acute infection compared to healthy controls ( $P=0.002$  and  $P=0.01$ , respectively). A statistically significant number of non-classical monocytes contained SARS-CoV-2 S1 protein in both severe ( $P=0.004$ ) and PASC patients ( $P=0.02$ ) out to 15 months post-infection. Non-classical monocytes were sorted from PASC patients using flow cytometric sorting and the SARS-CoV-2 S1 protein was confirmed by mass spectrometry. Cells from 4 out of 11 severe COVID-19 patients and 1 out of 26 PASC patients contained ddPCR+ peripheral blood mononuclear cells, however, only fragmented SARS-CoV-2 RNA was found in PASC patients. No full length sequences were identified, and no sequences that could account for the observed S1 protein were identified in any patient. Non-classical monocytes are capable of causing inflammation throughout the body in response to fractalkine/CX3CL1 and RANTES/CCR5.

88

## 89 INTRODUCTION

90

91 Post-acute sequelae SARS-CoV-2 infection (PASC) is a disabling and sometimes debilitating  
92 condition that occurs in 10%-30% of individuals infected by SARS-CoV-2 and has recently been  
93 proposed to cause neurologic symptoms in 30% of those infected (1). The number and extent of  
94 symptoms is extremely heterogeneous with some reports suggesting >200 different symptoms  
95 (2). The underlying cause of PASC symptoms has remained a mystery though some data has  
96 pointed to tissue reservoirs of persistent SARS-CoV-2 as a potential mechanism (3,4). We  
97 recently reported a machine learning approach that identified the unique immunologic signature  
98 of individuals with PASC (5). In the same report, we also identified characteristic immune cell  
99 subset abnormalities that accompanied the unique cytokine/chemokine profile. The predominant  
100 immune cell abnormality was elevations in monocyte subsets. Monocyte subpopulations are  
101 divided into 3 phenotypic and functionally distinct types. Classical monocytes exhibit the  
102 CD14<sup>++</sup>, CD16<sup>-</sup> phenotype, intermediate monocytes exhibit a CD14<sup>+</sup>, CD16<sup>+</sup> phenotype, and  
103 the non-classical monocytes express CD14<sup>lo</sup>, CD16<sup>+</sup> (6,7). Further they express very different  
104 cell surface markers as previously described. In particular, classical monocytes express high  
105 levels of the ACE-2 receptor, the putative receptor for SARS-CoV-2 (8). Intermediate and non-  
106 classical monocytes express very little ACE-2 receptor. Similarly, classical monocytes express  
107 low levels of the chemokine receptors CX3R1 and CCR5. Intermediate monocytes express high  
108 levels of CCR5 while non-classical monocytes express high levels of CX3R1. Here, we report  
109 kinetic differences in the proportions of monocyte subsets in severe cases and PASC, as well as  
110 the presence of SARS-CoV-2 protein unaccompanied by corresponding viral RNA in CD14<sup>lo</sup>,  
111 CD16<sup>+</sup> monocytes in PASC patients up to 16 months post-acute SARS-CoV-2 infection.

112

113 **RESULTS**

114 Similar to other inflammatory and infectious conditions such as sepsis, lupus erythematosus, and  
115 rheumatoid arthritis among others (9), we detected statistically significant increases ( $P < 0.002$ ) of  
116 intermediate CD14<sup>+</sup>, CD16<sup>+</sup> monocytes in individuals with PASC compared to healthy controls.  
117 In addition, CD14<sup>lo</sup>, CD16<sup>+</sup> non-classical monocytes were also significantly elevated in PASC  
118 ( $P = 0.01$ ). Neither intermediate nor non-classical monocytes were elevated in severe COVID-19  
119 (Figure 1).

120

121 Since the reports by our group and others found that monocyte subsets can be infected by HIV,  
122 HCV, Zika virus and Dengue fever virus (10-12), we screened peripheral blood mononuclear  
123 cells (PBMCs) from PASC individuals, as well as acute severe COVID-19 as controls, for  
124 SARS-CoV-2 RNA (Table 1). Using the highly sensitive, quantitative digital droplet PCR  
125 (ddPCR), we found that 36% (4 of 11) of severe COVID-19 patients' PBMCs contained SARS-  
126 CoV-2 RNA compared to 4% (1/26) of PASC patients' PBMCs. The one PASC patient that was  
127 RNA positive was 15 months post infection.

128

129 To further establish the exact reservoir contributing to the positive signal detected using ddPCR,  
130 we performed high parameter flow cytometry with antibodies that define B cell, T-cell, and  
131 monocytic subsets in addition to simultaneous staining of these cells with an antibody for the  
132 SARS-CoV-2 S1 protein. As demonstrated in Figure 2, we found distinct subpopulations of  
133 SARS-CoV-2 containing cells in the CD14<sup>lo</sup>, CD16<sup>+</sup> monocytic subset for 73% (19 out of 26)  
134 of PASC patients and 91% (10 out of 11) of severe COVID-19 patients. As demonstrated in  
135 Figure 3, the quantity of SARS-CoV-2 S1 containing cells were statistically significant in both

136 the severe patients (P=0.004) and in the PASC patients (P=0.02). Neither classical monocytes  
137 nor intermediate monocytes expressed the SARS-CoV-2 S1 protein.

138

139 To confirm the presence of SARS-CoV-2 S1 protein, we sorted CD14<sup>lo</sup>, CD16<sup>+</sup> monocytes and  
140 performed Ultra High-Performance Liquid Chromatography (UHPLC). Following  
141 immunoprecipitation, the elution fractions were dried down *in vacuo*, resuspended in ddH<sub>2</sub>O and  
142 purified by to remove any non-crosslinked SARS-CoV-2 S1 antibody as well as any detergents  
143 from the commercial immunoprecipitation buffers. The UHPLC collected fractions were dried *in*  
144 *vacuo*, resuspended in 100 mM HEPES (pH 8.0, 20% Acetonitrile), and subjected to cistern:  
145 reduction and alkylation with chloroacetamide. The samples were then digested with AspN and  
146 LysC endopeptidases for 16h at 37°C. The digested peptides were analyzed on an Agilent 6550  
147 IonFunnel QTOF and 1290 UHPLC by comparing patient samples to identical digests performed  
148 on commercially available SARS-CoV-2 S1 subunit. S1 subunit peptides from patient samples  
149 were mapped to a peptide database generated using commercial S1 subunit digests. Peptide  
150 identification consisted of matches in exact mass, isotope distribution, peptide charge state, and  
151 UHPLC retention time. As shown in Figure 4, the retention time of the representative peptide  
152 NLREFVFK in the digested commercial S1 subunit and Sample LH1-6 matched. Additionally,  
153 the Mass Spectra in Figure 4 show identical mass, isotope distribution, and charge states for the  
154 representative peptide NLREFVFK in the representative LH1 sample and commercial S1 subunit  
155 (also observed in LH 2-6, not shown). Using these metrics, up to 44% of the S1 subunit peptides  
156 could be identified in patient samples LH1-LH6 (Supplementary Table 1), providing  
157 complementary evidence to flow cytometry experiments that demonstrate the presence of S1  
158 subunit protein in these patient cells.

159 To determine whether the observed S1 spike protein was a product of persistent viral infection,  
160 whole viral genome sequencing was performed on monocytes from five patients. Coverage  
161 analysis of the human control amplicons revealed adequate coverage to positively identify  
162 human genomic content. This is consistent with extraction of viral genomic content from a  
163 human host. Human controls also included targeted amplicons for amelogenin (*AMELX* and  
164 *AMELY*). The ratio of *AMELX* and *AMELY* reads is consistent with the known genders of each  
165 sample.

166 The sequencing coverage for the five samples was consistent with low viral titer samples or  
167 samples with high Ct values. Average coverage was between 24.17-592.87x and percent bases  
168 covered at 10x and 20x was between 10.81-19.18% and 7.69-15.24% respectively (Table 2).  
169 This is well below the expected threshold to eliminate stretches of Ns > 99 for consensus  
170 sequence submission to GenBank and > 90% genome coverage at 10x for accurate lineage  
171 determination and sequence submission to GISAID ([www.gisaid.org](http://www.gisaid.org)). Evaluation of the reads  
172 revealed predominantly short reads (<100bp). To address poor quality reads, primer-dimers or  
173 reads that could possibly map to multiple loci, reads < MAPQ 10 were filtered resulting in the  
174 removal of 3.63-18.99% of total reads per sample.

175 Lineage determination of the five samples from high quality mutations in the callable regions  
176 yielded lineages of *B* and *B.1* and were non-specific due to inadequate coverage across the  
177 genome. Mutations were identified in *ORF1ab* in all but sample LH5. LH5 had mutations in *N*,  
178 *S*, and *ORF3b*. (Figure 5).

179

180 **DISCUSSION**

181 Here, we report the discovery of persistent SARS-CoV-2 protein in CD14<sup>lo</sup>, CD16<sup>+</sup> monocytes  
182 out to 15 months in some individuals and discuss the implications for the pathogenesis of PASC  
183 and severe cases of COVID-19. The three subtypes of circulating monocytes (classical,  
184 intermediate, non-classical) express very different cell surface molecules and serve very different  
185 functions in the immune system. Generally, classical' monocytes exhibit phagocytic activity,  
186 produce higher levels of ROS and secrete proinflammatory molecules such as IL-6, IL-8, CCL2,  
187 CCL3 and CCL5. Intermediate monocytes express the highest levels of CCR5 and are  
188 characterized by their antigen presentation capabilities, as well as the secretion of TNF- $\alpha$ , IL-1 $\beta$ ,  
189 IL-6, and CCL3 upon TLR stimulations. Non-classical monocytes expressing high levels of  
190 CX3CR1 are involved in complement and Fc gamma-mediated phagocytosis and anti-viral  
191 responses (6).

192 After maturation, human monocytes are released from bone marrow into the circulation as  
193 classical monocytes. Currently, strong evidence supports the concept that intermediate and non-  
194 classical monocytes emerge sequentially from the pool of classical monocytes (13). This is  
195 supported by transcriptome analysis showing that CD16<sup>+</sup> monocytes have a more mature  
196 phenotype (14). In humans, 85% of the circulating monocyte pool are classical monocytes,  
197 whereas the remaining 15% consist of intermediate and nonclassical monocytes (13). Classical  
198 monocytes have a circulating lifespan of approximately one day before they either migrate into  
199 tissues, die, or turn into intermediate and subsequently nonclassical monocytes (6,13).

200 During pathologic conditions mediated by infectious/inflammatory reactions, the proportions of  
201 monocyte subsets vary according to the functionality of each specific subpopulation (6,13,15).

202 Our previous results show that during early stages of the disease, PASC group have reduced  
203 classical monocyte and increased intermediate monocyte percentages compared with healthy

204 controls (5). We find an increase in nonclassical monocytes in PASC group 6-15 months post  
205 infection, and higher percentages of intermediate and nonclassical monocytes at day 0 in severe  
206 cases, suggesting augmented classical-intermediate-nonclassical monocyte transition in both  
207 groups but with different kinetics.

208 The clinical relevance of monocyte activation in COVID-19 patients and the significance of  
209 these cells as viral protein reservoir in PASC is supported by our data reporting the presence of  
210 S1 protein within nonclassical monocytes. Viral particles and/or viral proteins can enter  
211 monocyte subpopulations in distinct ways, and this appears to be regulated differently in  
212 individuals that will develop severe disease or PASC. Classical monocytes are primarily  
213 phagocytes and express high levels of the ACE-2 receptor (8). Therefore, they could either  
214 phagocyte viral particles and apoptotic virally infected cells or be potential targets for SARS-  
215 CoV-2 infection. Considering their short circulating lifespan, viral protein-containing classic  
216 monocytes turn into intermediate and nonclassical monocytes. According to our results, this  
217 process happens faster in the severe group than in the PASC group. Indeed, at early stages of the  
218 disease the severe group show increased nonclassical monocytes whereas in PASC both the  
219 intermediate monocytes and non-classical monocytes are elevated. Additionally, CD14<sup>+</sup>CD16<sup>+</sup>  
220 monocytes express intermediate levels of ACE-2 receptors and could as well serve as an  
221 infectious target of SARS-CoV-2 as it has been proved to be an infectious target of HIV-1 and  
222 HCV<sup>11</sup>. Nonclassical monocytes have been proposed to act as custodians of vasculature by  
223 patrolling endothelial cell integrity (16), thus pre-existing CD14<sup>lo</sup> CD16<sup>+</sup> cells could ingest  
224 virally infected apoptotic endothelial cells augmenting the proportion of nonclassical monocytes  
225 containing S1 protein. This mechanism is more likely to take place in the PASC group where the  
226 S1 protein was detected 12-15 months post infection than in the severe group. Furthermore,



227 nonclassical monocytes are associated with FcR-mediated phagocytosis (17,18), which might be  
228 related with the ingestion of opsonized viral particles after antibody production at later stages of  
229 the disease in PASC.

230 Previous reports indicate that the numbers of classical monocytes decrease, but the numbers of  
231 intermediate and non-classical monocytes increase in COVID-19 patients (19). Thus, the  
232 presence of S1 protein in nonclassical monocytes in both severe and PASC, might be associated  
233 with clinical characteristics and outcome of these groups. Previously, we found that individuals  
234 with severe COVID-19 have high systemic levels of IL-6, IL-10, VEGF and sCD40L (5).

235 Consistent with our data, other studies showed association of increased production of IL-6,  
236 VEGF and IL-10 by nonclassical monocytes with disease severity (20-22).

237 In the case of PASC, the persistence of circulating S1-containing nonclassical monocytes up to  
238 16 months post infection, independently of the different possible mechanisms of viral proteins  
239 internalization discussed above, indicates that certain conditions are required to maintain this cell  
240 population. It has been shown in both humans and mice that nonclassical monocytes require  
241 fractalkine (CX3CL1) and TNF to inhibit apoptosis and promote cell survival (22). Our previous  
242 data show high IFN- $\gamma$  levels in PASC individuals (5), which can induce TNF- $\alpha$  production (23).  
243 Further, TNF- $\alpha$  and IFN- $\gamma$  induce CX3CL1/Fractalkine production by vascular endothelial cells<sup>24</sup>  
244 creating the conditions to promote survival of nonclassical monocytes. Another important aspect  
245 is the permanency of S1-containing cells in the circulation, intermediate monocytes express high  
246 levels of CCR5 and extravasation of these cells can occur in response to CCL4 gradients. We  
247 showed that PASC individuals have low levels of CCL4 (5) maintaining these cells in circulation  
248 until they turn into nonclassical monocytes. Moreover, IFN- $\gamma$  induced CX3CL1/Fractalkine

249 production by endothelial cells (23) creates a gradient within the vascular compartment  
250 preserving nonclassical monocytes expressing CX3CR1 in the circulation.

251 Nonclassical monocytes are usually referred as anti-inflammatory cells (22), nevertheless it was  
252 recently shown that this subset can acquire a proinflammatory phenotype (25). Nonclassical  
253 monocytes acquire hallmarks of cellular senescence, which promote long term survival of these  
254 cells in circulation as explained above. Additionally, this induces an inflammatory state of the  
255 non-classical monocytes that could be a manifestation of the senescence-associated secretory  
256 phenotype (SASP), characterized by a high basal NF- $\kappa$ B activity and production of pro-  
257 inflammatory cytokines such as IL-1 $\alpha$ , TNF- $\alpha$  and IL-8 (25).

258 The hallmark of PASC is the heterogeneity of symptoms arising in a variety of tissues and  
259 organs. These symptoms are likely associated with the inflammatory phenotype of these  
260 senescent nonclassical monocytes. The CD14<sup>lo</sup>, CD16<sup>+</sup>, S1 protein<sup>+</sup> monocytes could be  
261 preferentially recruited into anatomic sites expressing fractalkine and contribute to vascular and  
262 tissue injury during pathological conditions in which this monocyte subset is expanded as  
263 previously demonstrated in non-classical monocytes without S1 protein. Previously, CD16<sup>+</sup>  
264 monocytes were demonstrated to migrate into the brain of AIDS patients expressing high levels  
265 of CX3CL1 (fractalkine) and SDF-1 (26), and mediate blood-brain barrier damage and neuronal  
266 injury in HIV-associated dementia via their release of proinflammatory cytokines and neurotoxic  
267 factors. These sequelae are very common in PASC and these data could represent the underlying  
268 mechanism for the symptoms. Interestingly, a number of papers have been written discussing the  
269 increased mobilization of CD14<sup>lo</sup>, CD16<sup>+</sup> monocytes with exercise (27). These data support the  
270 reports of worsening PASC symptoms in individuals resuming pre-COVID exercise regimens. In  
271 summary, the mechanism of PASC discussed in this report suggests that intermediate monocytes

272 remain in circulation due to low CCL4 levels extending their time to differentiate leading to an  
273 accumulation of non-classical monocytes. The utility of using CCR5 antagonists in preventing  
274 migration of intermediate and non-classical monocytes due to the elevated levels of  
275 CCL5/RANTES in PASC (5). Further, our data suggests that interruption of the  
276 CX3CR1/fractalkine pathway would be a potential therapeutic target to reduce the survival of  
277 S1-containing non-classical monocytes and the associated vascular inflammation previously  
278 discussed (5) and presented here.

279 It is important to note that the S1 protein detected in these patients appears to be retained from  
280 prior infection or phagocytosis of infected cells undergoing apoptosis and is not the result of  
281 persistent viral replication. Full length sequencing of the five cases submitted for genomic  
282 analysis failed to identify any full-length sequence in the spike protein gene, or any other gene,  
283 that could account for the observed spike protein detected by proteomic analysis. In contrast,  
284 fragmented SARS-CoV-2 sequence was identified in all five of the cases. We have observed a  
285 pattern of high Ct value or negativity by PCR, accompanied by scant, fragmented viral sequence  
286 identified by whole viral genome sequencing over the past several months, a major shift from the  
287 low Ct value, full length viral sequences identified throughout most of 2020. The reasons for this  
288 shift are unclear, but as seen in these cases, it is unlikely these patients are producing any  
289 replication competent viral genomes, and are thus incapable of transmitting the infection. In  
290 contrast, the patients reported here appear to have developed an immune response to retained  
291 viral antigens, specifically the S1 fragment of the spike protein, which continues to be presented  
292 by CD16+ monocytes, eliciting an innate immune response characterized by elevated  
293 inflammatory markers including interferon  $\gamma$ , IL-6, IL-10, and IL-2, among others. The body of  
294 evidence reported here would not support continued viral replication. Instead, it implicates

295 dysregulation of innate immunity inflammatory mediators in response to persistent viral protein  
296 presentation by CD16+ monocytes.

297

## 298 **MATERIAL/METHODS**

### 299 *Patients*

300 Following informed consent, whole blood was collected in a 10 mL EDTA tube and a 10 mL plasma  
301 preparation tube (PPT). A total of 144 individuals were enrolled in the study consisting of 29 normal  
302 individuals, 26 mild-moderate COVID-19 patients, 25 severe COVID-19 patients and 64 chronic COVID  
303 (long hauler-LH) individuals. Long Haulers symptoms are listed in Figure 1. Study subjects were  
304 stratified according to the following criteria.

### 305 Mild

- 306 1. Fever, cough, sore throat, malaise, headache, myalgia, nausea, diarrhea, loss of taste and smell
- 307 2. No sign of pneumonia on chest imaging (CXR or CT Chest)
- 308 3. No shortness of breath or dyspnea

### 309 Moderate:

- 310 1. Radiological findings of pneumonia fever and respiratory symptoms
- 311 2. Saturation of oxygen (SpO<sub>2</sub>) ≥ 94% on room air at sea level

### 312 Severe

- 313 1. Saturation of oxygen (SpO<sub>2</sub>) < 94% on room air at sea level
- 314 2. Arterial partial pressure of oxygen (PaO<sub>2</sub>)/ fraction of inspired oxygen (FiO<sub>2</sub>) < 300mmHG
- 315 3. Lung infiltrate > 50% within 24 to 48 hours
- 316 4. HR ≥ 125 bpm
- 317 5. Respiratory rate ≥ 30 breaths per minute

### 318 Critical

- 319 1. Respiratory failure and requiring mechanical ventilation, ECMO, high-flow nasal cannula oxygen  
320 supplementation, noninvasive positive pressure ventilation (BiPAP, CPAP)  
321 2. Septic Shock- Systolic blood pressure < 90mmHg or Diastolic blood pressure < 60 mmHg or  
322 requiring vasopressors (levophed, vasopressin, epinephrine)  
323 3. Multiple organ dysfunction (cardiac, hepatic, renal, CNS, thrombotic disease)

324

325 Post-acute COVID-19 (Long COVID)

- 326 1. Extending beyond 3 weeks from the initial onset of first symptoms

327 Chronic COVID-19

- 328 1. Extending beyond 12 weeks from the initial onset of first symptoms (Table 1S)

329

330 *High Parameter Immune Profiling/Flow Cytometry*

331 Peripheral blood mononuclear cells were isolated from peripheral blood using Lymphoprep density  
332 gradient (STEMCELL Technologies, Vancouver, Canada). Aliquots 200 of cells were frozen in media  
333 that contained 90% fetal bovine serum (HyClone, Logan, UT) and 10% dimethyl sulfoxide (Sigma-  
334 Aldrich, St. Louis, MO) and stored at -70°C. Cells were stained and analyzed using a 17-color antibody  
335 cocktail (Supplementary Table 1) including a PE-labeled SARS-CoV-2 S1 antibody (Supplementary  
336 Table 1).

337 *Digital Droplet PCR*

338 A QIAamp Viral Mini Kit (Qiagen, Catalog #52906) was used to extract nucleic acids from 300 to 400  
339 mL of plasma sample according to the manufacturer's instructions and eluted in 50 mL of AVE buffer  
340 (RNase-free water with 0.04% sodium azide). The purified nucleic acids were tested immediately with a  
341 Bio-Rad SARS-CoV-2 ddPCR Kit (Bio-Rad, Hercules, CA, USA). The panel was designed for  
342 specifically detecting 2019-nCoV (two primer/probe sets). An additional primer/probe set was used to  
343 detect the human RNase P gene in control samples and clinical specimens. RNA isolated and purified

344 from the plasma samples (5.5 mL) was added to a master mix comprising 1.1 mL of 2019-nCoV triplex  
345 assay, 2.2 mL of reverse transcriptase, 5.5 mL of supermix, 1.1 mL of dithiothreitol, and 6.6 mL of  
346 nuclease-free water.  
347 The mixtures were then fractionated into up to 20,000 nanoliter-sized droplets in the form of a water-in-  
348 oil emulsion in a QX200 Automated Droplet Generator (Bio-Rad, Hercules, CA). The 96-well real-time-  
349 digital droplet polymerase chain reaction (RT-ddPCR) ready plate containing droplets was sealed with  
350 foil using a plate sealer and thermocycled to reverse transcribe the RNA, before PCR amplification of  
351 cDNA in a C1000 Touch thermocycler (Bio-Rad, Hercules, CA, USA). After PCR, the plate was loaded  
352 into a QX200 Droplet Reader (Bio-Rad, Hercules, CA, USA) and the fluorescence intensity of each  
353 droplet was measured in two channels (FAM and HEX). The fluorescence data were then analyzed with  
354 QuantaSoft 1.7 and QuantaSoft Analysis Pro 1.0 Software (Bio-Rad, Hercules, CA, USA).

355

#### 356 *Flow Cytometric Cell Sorting*

357 Cryopreserved PBMCs were quick-thawed, centrifuged, and washed in 2% BSA solution in D-  
358 PBS. Cells were blocked for 5 min. in 2% BSA and then incubated at room temperature for 30  
359 min. with Alexa Fluor® 488 Anti-CD45 antibody (IncellDx, 1/100 dilution), 2.5 ug of Alexa  
360 Fluor® 647 Anti-CD16 antibody (BD, Cat. # 55710), and 1 ug of PerCP/Cy5.5 Anti-human  
361 CD14 antibody (Biolegend, Cat. #325622). Cells were washed twice with 2% BSA/D-PBS,  
362 filtered, and kept on ice for the duration of the cell sort. Data was acquired on a Sony SH800,  
363 and only CD45+ cells staining positive for both CD14+ and CD16+ were sorted into test tubes  
364 with 100 uL 2% BSA solution. Sort purity of control PBMCs was confirmed to be >99% by re-  
365 analyzing sorted PBMCs using the same template and gating strategy.

366

#### 367 *Single Cell Protein Identification*

368

369 Patient cells were sorted based on phenotypic markers (as above) and frozen at  $-80^{\circ}\text{C}$ . Six patient  
370 samples with positive flow cytometry signal and sufficient cell counts were chosen for LCMS  
371 confirmation. Frozen cells were lysed with the IP Lysis/Wash Buffer from the kit according to the  
372 manufacturer's protocol. 10  $\mu\text{g}$  of anti-S1 mAb were used to immunoprecipitate the S1 Spike  
373 protein from cell lysate of each patient. After overnight incubation with end-over-end rotation at  
374  $4^{\circ}\text{C}$  and then three washes with IP Lysis/Wash Buffer, bound S1 Spike protein was eluted with the  
375 elution buffer from the kit.

376 IP elution fractions were dried *in vacuo*, resuspended in 20  $\mu\text{L}$  of water, pooled, and purified by  
377 Agilent 1290 UPLC Infinity II on a Discovery C8 (3cm x 2.1 mm, 5  $\mu\text{m}$ , Sigma-Aldrich, room  
378 temperature) using mobile phase solvents of 0.1% trifluoroacetic acid (TFA) in water or  
379 acetonitrile. The gradient is as follows: 5-75% acetonitrile (0.1% TFA) in 4.5 min (0.8 mL/min),  
380 with an initial hold at 5% acetonitrile (0.1% TFA) for 0.5 min (0.8 mL/min). The purified protein  
381 was dried *in vacuo* and resuspended in 50  $\mu\text{L}$  of 100 mM HEPES, pH 8.0 (20% Acetonitrile). 1  
382  $\mu\text{L}$  of TCEP (100 mM) was added and the samples were incubated at  $37^{\circ}\text{C}$  for 30 min. 1  $\mu\text{L}$  of  
383 chloroacetamide (500 mM) was added to the samples and incubated at room temperature for 30  
384 min. 1  $\mu\text{L}$  rAspN (Promega 0.5  $\mu\text{g}/\mu\text{L}$ ) and 1  $\mu\text{L}$  of LysC (Pierce, 1  $\mu\text{g}/\mu\text{L}$ ) were added and the  
385 samples incubated at  $37^{\circ}\text{C}$  for 16 h, prior to LCMS analysis.

386

### 387 *LC-MS analysis*

388 Digested recombinant SARS-CoV-2 Spike S1 protein was analyzed by a high mass accuracy mass  
389 spectrometer to generate a list of detectable peptides with retention time and accurate masses. An  
390 Agilent 1290 Infinity II high pressure liquid chromatography (HPLC) system and an AdvanceBio

391 Peptide Mapping column (2.1 × 150 mm, 2.7 μm) were used for peptide separation prior to mass  
392 analysis. The mobile phase used for peptide separation consists of a solvent A (0.1% formic acid  
393 in H<sub>2</sub>O) and a solvent B (0.1% formic acid in 90% CH<sub>3</sub>CN). The gradient was as follows: 0–1 min,  
394 3% B; 1– 30 min, to 40% B; 30–33 min, to 90% B; 33-35 min, 90% B; 37-39 min, 3% B. Eluted  
395 peptides were electrosprayed using a Dual JetStream ESI source coupled with the Agilent 6550  
396 iFunnel time-of-flight MS analyzer. Data was acquired using the MS method in 2 GHz (extended  
397 dynamic range) mode over a mass/charge range of 50–1700 Daltons and an auto MS/MS method.  
398 Acquired data were saved in both centroid and profile mode using Agilent Masshunter Workstation  
399 B09 Data acquisition Software. The same analytical method was applied to immunoprecipitated  
400 samples from sorted patient cells except no ms/ms was acquired.

401

#### 402 *Viral Genome Detection by PCR and Whole Viral Genome Sequencing*

#### 403 *Ct Determination with TaqPath Assay*

404 Five RNA samples were subjected to the TaqPath COVID-19 Combo Kit Assay (Thermo Fisher  
405 Scientific Catalog no. A47814) to assess the cycle of threshold. TaqPath COVID-19 Combo Kit assay  
406 was performed according to recommendations of the EUA, using the Applied BioSystems QuantStudio 7  
407 Flex (Thermo Fisher Scientific Catalog no. 4485701).

#### 408 *Whole Genome Sequencing of Samples with Ion AmpliSeq*

409 Five RNA samples were subjected to AmpliSeq library preparation using the Ion AmpliSeq Library Kit  
410 2.0 (Thermo Fisher Scientific Catalog no. 4480441) and the Thermo Fisher Scientific Insight panel,  
411 which consists of 238 amplicons in a two pool design against SARS-CoV-2 and seven amplicons as  
412 human controls. Libraries were prepared following manufacturer's recommendations. Final libraries were  
413 amplified using 5 cycles of amplification and libraries were cleaned up using 0.5X right sided cleanup



414 and 1.2X left sided cleanup using Kapa Pure Beads (Roche Catalog no 17983298001). Final libraries were  
415 quantified using Ion Library TaqMan Quantitation Kit (ThermoFisher Catalog no. 4468802). Samples  
416 were pooled in an equimolar distribution and loaded on to the Ion Chef Instrument (ThermoFisher  
417 Catalog no. 4484177) for Templating onto a 510 chip. The prepared chip was then loaded onto a  
418 GeneStudio S5 Prime (ThermoFisher Catalog no. A38196) for sequencing.

### 419 ***Genome Assembly, Quality Control, and Sequencing Analysis***

420 Sequencing reads were aligned to the SARS-CoV-2 genome (build NC\_045512.2) and human  
421 transcriptome (build GRCh37) using the Thermo Fisher Scientific TMAP aligner. Default parameters  
422 were used except for the *--context* flag.

423 Coverage analysis was performed by the coverageAnalysis plugin in Thermo Fisher Scientific Torrent  
424 Suite software. Reads in the human controls were evaluated for quality control. Per-base coverage,  
425 average coverage, and percent genome covered at various depth thresholds were assessed using custom  
426 software. Read length distribution versus read quality (MAPQ score) were further evaluated.

427 Variant calling was performed on SARS-CoV-2 using the variantCaller plugin. Callable regions were  
428 identified as regions with read depth  $\geq 20$  after filtering reads with  $\text{MAPQ} < 10$ . Variants were filtered  
429 for quality by removing mutations with allele frequency (AF)  $< 0.5$  in the callable regions. Lineage  
430 determination was made with pangoleARN v1.2.13 using filtered-in mutations.

431

432

433

434

435

436

437

438 **REFERENCES**

439

- 440 1. R. Rubin. As Their Numbers Grow, COVID-19 “Long Haulers” Stump  
441 Experts. *JAMA*. **324**, 1381–1383 (2020). doi:10.1001/jama.2020.17709
- 442 2. <https://www.cdc.gov/coronavirus/2019-ncov/hcp/clinical-care/post-covid-conditions.html>  
443 (April 8, 2021).
- 444 3. X.H. Yao, Z.C. He, T.Y. Li, H. R. Zhang, Y. Wang, H. Mou, Q. Guo, S.C. Yu, Y. Ding,  
445 X. Liu, Y.F. Ping, X.W. Bian. Pathological evidence for residual SARS-CoV-2 in  
446 pulmonary tissues of a ready-for-discharge patient. *Cell Res*. **30**, 541-543 (2020). doi:  
447 10.1038/s41422-020-0318-5. Epub 2020 Apr 28. PMID: 32346074; PMCID:  
448 PMC7186763.
- 449 4. R. Nienhold, Y. Ciani, V.H. Koelzer, A. Tzankov, J.D. Haslbauer, T. Menter, N. Schwab,  
450 M. Henkel, A. Frank, V. Zsikla, N. Willi, W. Kempf, T. Hoyler, M. Barbareschi, H.  
451 Moch, M. Tolnay, G. Cathomas, F. Demichelis, T. Junt, K.D. Mertz. Two distinct  
452 immunopathological profiles in autopsy lungs of COVID-19. *Nat Commun*. **11**, 5086  
453 (2020). doi: 10.1038/s41467-020-18854-2.
- 454 5. B.K. Patterson, J. Guevarra-Coto, R. Yogendra, E. B. Francisco, E. Long, A. Pise, H.  
455 Rodrigues, P. Parikh, J. Mora. R.A. Mora-Rodríguez. Immune-based prediction of  
456 COVID-19 severity and chronicity decoded using machine learning. *Front Immunol*  
457 (2021) <https://doi.org/10.3389/fimmu.2021.700782>.
- 458 6. T.S. Kapellos, L. Bonaguro, I. Gemünd, N. Reusch, A. Saglam, E. R Hinkley, J. L.  
459 Schultze. Human monocyte subsets and phenotypes in major chronic inflammatory  
460 diseases. *Front Immunol* **10**, 1–13 (2020) <https://doi.org/10.3389/fimmu.2019.02035>.
- 461 7. L. Ziegler-Heitbrock. The CD14+ CD16+ blood monocytes: their role in infection and  
462 inflammation. *J Leuk Biol* **81**, 584–592 (2007). <https://doi.org/10.1189/jlb.0806510>.
- 463 8. M. Rutkowska-Zapała, M. Suski, R. Szatanek, M. Lenart, K. Węglarczyk, R. Olszanecki,  
464 T. Grodzicki, M. Strach, J. Gąsowski, M. Siedlar. Human monocyte subsets exhibit  
465 divergent angiotensin I-converting activity *Clin Exp Immunol* **181**, 126–132 (2015).
- 466 9. R. Mukherjee, P. Kanti Barman, P. Kumar Thatoi, R. Tripathy, B. Kumar Das, B.  
467 Ravindran. Non-Classical monocytes display inflammatory features: Validation in Sepsis  
468 and Systemic Lupus Erythematosus. *Sci Rep*. **5**, 13886 (2015). doi: 10.1038/srep13886.
- 469 10. D. Michlmayr, P. Andrade, K. Gonzalez, A. Balmaseda, E. Harris. CD14+CD16+  
470 monocytes are the main target of Zika virus infection in peripheral blood mononuclear  
471 cells in a paediatric study in Nicaragua. *Nature Microbiology*, **2**, 1462–1470 (2017).  
472 <https://doi.org/10.1038/s41564-017-0035-0>
- 473 11. Coquillard G, Patterson BK. Determination of hepatitis C virus-infected, monocyte  
474 lineage reservoirs in individuals with or without HIV coinfection. *J Infect Dis*. **200**, 947-  
475 954 (2009). doi: 10.1086/605476. PMID: 19678757.
- 476 12. P. Ancuta, K.J.Kunstman, P. Autissier, T. Zaman, D. Stone, S.M. Wolinsky, D.Gabuzda.  
477 CD16+ monocytes exposed to HIV promote highly efficient viral replication upon  
478 differentiation into macrophages and interaction with T cells. *Virology* **344**, 267–276  
479 (2006). <https://doi.org/10.1016/j.virol.2005.10.027>
- 480 13. A.A. Patel, Y. Zhang, J.N.Fullerton, L. Boelen,, A. Rongvaux, A.A. Maini, V.Bigley,  
481 R.A. Flavell, D.W. Gilroy, B. Asquith, D. Macallan, S. Yona. The fate and lifespan of

- 482 human monocyte subsets in steady state and systemic inflammation. *J Exp Med.* **214**,  
483 1913-1923 (2017). doi: 10.1084/jem.20170355. Epub 2017 Jun 12. PMID: 28606987;  
484 PMCID: PMC5502436.
- 485 14. P. Ancuta, K.Y. Liu KY, V. Misra, V.S. Wacliche, A. Gosselin, X. Zhou, D. Gabuzda.  
486 Transcriptional profiling reveals developmental relationship and distinct biological  
487 functions of CD16+ and CD16- monocyte subsets. *BMC Genomics* **10**, 403 (2009). doi:  
488 10.1186/1471-2164-10-403. PMID: 19712453; PMCID: PMC2741492.
- 489 15. T. Tak, R. van Groenendael, P. Pickkers, L. Koenderman. Monocyte subsets are  
490 differentially lost from the circulation during acute inflammation induced by human  
491 experimental endotoxemia. *J Innate Immun.* **9**, 464-474 (2017). doi: 10.1159/000475665.  
492 Epub 2017 Jun 23. PMID: 28641299; PMCID: PMC6738874.
- 493 16. C. Auffray, D. Fogg, M. Garfa, G. Elain, O. Join-Lambert, S. Kayal, S. Sarnacki, A.  
494 Cumano, G. Lauvau, F. Geissmann. Monitoring of blood vessels and tissues by a  
495 population of monocytes with patrolling behavior. *Science* **317**, 666-670 (2007). doi:  
496 10.1126/science.1142883. PMID: 17673663.
- 497 17. S.T. Gren, T.B. Rasmussen, S. Janciauskiene. A single-cell gene-expression profile  
498 reveals inter-cellular heterogeneity within human monocyte subsets. *PLoS One* **10**,  
499 e0144351 (2015). doi: 10.1371/journal.pone.0144351. PMID: 26650546; PMCID:  
500 PMC4674153.
- 501 18. K.L. Wong, J.J. Tai, W.C. Wong, H. Han, X. Sem, W.H. Yeap, P. Kourilsky, S.C. Wong.  
502 Gene expression profiling reveals the defining features of the classical, intermediate, and  
503 nonclassical human monocyte subsets. *Blood.* **118**, e16-31 (2011). doi: 10.1182/blood-  
504 2010-12-326355. Epub 2011 Jun 7. PMID: 21653326.
- 505 19. A. Jafarzadeh, P. Chauhan, B. Saha, S. Jafarzadeh, M. Nemati. Contribution of  
506 monocytes and macrophages to the local tissue inflammation and cytokine storm in  
507 COVID-19: Lessons from SARS and MERS, and potential therapeutic interventions. *Life*  
508 *Sci.* **257**, 118102 (2020). doi: 10.1016/j.lfs.2020.118102. Epub 2020 Jul 18. PMID:  
509 32687918; PMCID: PMC7367812.
- 510 20. Y. Zhou, B. Fu, X. Zheng. Pathogenic T-cells and inflammatory monocytes incite  
511 inflammatory storms in severe COVID-19 patients, *National Science Review* **7**, 998–1002  
512 (2020).
- 513 21. C.E. Olingy, C.L. San Emeterio, M.E. Ogle, J.R. Krieger, A.C. Bruce, D.D. Pfau, B.T.  
514 Jordan, S.M. Peirce, E.A. Botchwey. Non-classical monocytes are biased progenitors of  
515 wound healing macrophages during soft tissue injury. *Sci Rep.* **7**, 447 (2017). doi:  
516 10.1038/s41598-017-00477-1. PMID: 28348370; PMCID: PMC5428475.
- 517 22. P.B. Narasimhan, P. Marcovecchio, A.A.J. Anouk, C.C. Hedrick. Nonclassical  
518 monocytes in health and disease. *Ann Rev Immunol* **37**, 439-456 (2019).
- 519 23. V. Vila-del Sol, C. Punzón, M. Fresno. IFN-gamma-induced TNF-alpha expression is  
520 regulated by interferon regulatory factors 1 and 8 in mouse macrophages. *J Immunol*  
521 **181**:4461-4470 (2008). doi: 10.4049/jimmunol.181.7.4461. PMID: 18802049.
- 522 24. T. Matsumiya, K. Ota, T. Imaizumi, H. Yoshida, H. Kimura, K. Satoh. Characterization  
523 of Synergistic Induction of CX3CL1/Fractalkine by TNF- $\alpha$  and IFN- $\gamma$  in vascular  
524 endothelial cells: an essential role for TNF- $\alpha$  in post-transcriptional regulation of  
525 CX3CL1. *J Immunol* **184**, 4205-4214 (2010). DOI: 10.4049/jimmunol.0903212.
- 526 25. S.M. Ong, E. Hadadi, T.M. Dang, W.H. Yeap, C.T. Tan, T.P. Ng, A. Larbi,  
527 S.C. Wong. The pro-inflammatory phenotype of the human non-classical monocyte subset

- 528 is attributed to senescence. *Cell Death Dis* **9**, 266 (2008).  
529 <https://doi.org/10.1038/s41419-018-0327-1>.  
530 26. C.F. Pereira, J. Middel, G. Jansen, H.S. Nottet. Enhanced expression of fractalkine in  
531 HIV-1 associated dementia. *J Neuroimmunol* **115**, 168-115 (2001). doi: 10.1016/s0165-  
532 5728(01)00262-4. PMID: 11282167.  
533 27. A.R. Jajtner, J.R. Townsend, K.S. Beyer, A.N. Varanoske, D.D. Church, L.P. Oliveira,  
534 K.A. Herrlinger, S. Radom-Aizik, D.H. Fukuda, J.R. Stout, J.R. Hoffman. Resistance  
535 exercise selectively mobilizes monocyte subsets: role of polyphenols. *Med Sci Sports*  
536 *Exerc.* **50**, 2231-2241 (2018). doi: 10.1249/MSS.0000000000001703. PMID: 29957728.

537  
538

#### 539 **Ethics**

540 Informed consent was obtained from all participants.

541

#### 542 **Data and materials availability:**

543 All requests for materials and raw data should be addressed to the corresponding author

544

#### 545 **Competing interests:**

546 B.K.P, A.P., H.R., E.L, and EBF. are employees of IncellDx, Inc

547 TJT, PS, SH, DM are employees of Avrok Laboratories, Inc

548

#### 549 **Author contributions:**

550 R.Y. and P.P. organized the clinical study and actively recruited patients.

551 B.K.P, A.P., H.R., X.E, E.L., J.B.S., TJT, PS, SH, DM performed experiments and analyzed the data.

552 J.G-C., R.A.M., J.M., X.C. performed the statistics and bioinformatics

553 B.K.P., J.M., EBF, J.G-C., R.A.M. wrote the draft of the manuscript and all authors contributed to

554 revising the manuscript prior to submission.

555

#### 556 **Funding:** None

557

558

559

560

561

562

563

564

565

566

567

568

569

570

571

572

573

574

575 **TABLE and FIGURE LEGENDS**

576

577 Table 1. Molecular analysis of study participants.

| COVID-19 Status | Sars-CoV-2 RNA+ |       | Months Post-Infection |
|-----------------|-----------------|-------|-----------------------|
|                 | NS              | PBMCs |                       |
| HC 1            | -               | -     | n/a                   |
| HC 2            | -               | -     | n/a                   |
| HC 3            | -               | -     | n/a                   |
| HC 4            | -               | -     | n/a                   |
| HC 5            | -               | -     | n/a                   |
| HC 6            | -               | -     | n/a                   |
| HC 7            | -               | -     | n/a                   |
| HC 8            | -               | -     | n/a                   |
| Asymptomatic    | +               | +     | n/a                   |
| Severe 1        | +               | -     | n/a                   |
| Severe 2        | +               | +     | n/a                   |
| Severe 3        | +               | -     | n/a                   |
| Severe 4        | +               | -     | n/a                   |
| Severe 5        | +               | -     | n/a                   |
| Severe 6        | +               | -     | n/a                   |
| Severe 7        | +               | +     | n/a                   |
| Severe 8        | +               | -     | n/a                   |
| Severe 9        | +               | -     | n/a                   |
| Severe 10       | +               | +     | n/a                   |
| Severe 11       | +               | +     | n/a                   |
| LH 1            | +               | -     | 13                    |
| LH 2            | +               | -     | 14                    |
| LH 3            | +               | -     | 6                     |
| LH 4            | +               | -     | 11                    |
| LH 5            | +               | +     | 15                    |
| LH 6            | +               | -     | 13                    |
| LH 7            | +               | -     | 12                    |
| LH 8            | +               | -     | 7                     |
| LH 9            | +               | -     | 14                    |
| LH 10           | +               | -     | 13                    |
| LH 11           | +               | -     | 12                    |
| LH 12           | +               | -     | 12                    |
| LH 13           | +               | -     | 6                     |
| LH 14           | +               | -     | 14                    |
| LH 15           | +               | -     | 13                    |
| LH 16           | +               | -     | 9                     |
| LH 17           | +               | -     | 11                    |
| LH 18           | +               | -     | 7                     |

|       |   |   |    |
|-------|---|---|----|
| LH 19 | + | - | 14 |
| LH 20 | + | - | 11 |
| LH 21 | + | - | 13 |
| LH 22 | + | - | 10 |
| LH 23 | + | - | 8  |
| LH 24 | + | - | 7  |
| LH 25 | + | - | 12 |
| LH 26 | + | - | 15 |

---

578 **Table 2: Average Coverage and Percent Bases Covered at 20x** While the percent of bases  
579 covered varied across patients, all were less than 20% at 10X, and less at 20X coverage. In no  
580 case was full length viral genome RNA detected, consistent with a lack of replication competent  
581 viral infection.

582

| Sample         | Average Coverage | Percent Bases Covered at 10x | Percent Bases Covered at 20x |
|----------------|------------------|------------------------------|------------------------------|
| 02-03_20210625 | 171.64           | 19.18                        | 15.24                        |
| ABA-2_20210625 | 59.67            | 14.04                        | 10.42                        |
| BGI-2_20210625 | 24.17            | 10.81                        | 7.69                         |
| CST-2_20210625 | 40.29            | 11.71                        | 7.79                         |
| RG_20210625    | 592.87           | 12.6743                      | 10.16                        |

583

584

585

586

587

588

589

590

591

592

593

594

595

596

597

598

599

600

601

602

603

604

605 **Figure 1.** Quantification of classical, intermediate and non-classical monocytes in PASC (LH).  
606 Non-classical monocytes were significantly elevated in severe COVID-19 and in PASC.

607  
608 **Figure 2.** High parameter flow cytometric quantification of SARS-CoV-2 S1 protein in  
609 monocytic subsets. Cells were gated on CD45 then analyzed for CD14 and CD16 expression.  
610 Classical monocytes are green, intermediate monocytes are red and non-classical monocytes are  
611 blue.

612  
613 **Figure 3.** Quantification of SARS-CoV-2 S1 protein in monocyte subsets isolated from healthy  
614 controls (HC), severe COVID-19 (severe), and PASC patients (LH). SARS-CoV-2 S1 protein  
615 was expressed in non-classical monocytes in both severe and PASC individuals. The amount of  
616 expression was statistically significant.

617  
618 **Figure 4.** LCMS confirmation of the presence of S1 subunit in samples LH1-6. A. Extracted ion  
619 chromatogram (EIC) displaying the NLREFVFK peptide. The retention time matches that of the  
620 NLREFVFK peptide in the commercial S1 standard. B. Mass Spectra of the NLREFVFK from  
621 both the commercial standard and patient LH1. The Spectra show the same mass and isotope  
622 distribution.

623 **Figure 5:** High Quality Mutations in the Callable Regions. Only fragmented viral RNA was  
624 identified in the five patients, but multiple mutations throughout the viral genome were  
625 identified, the vast majority of which were unique to each patient. Overall coverage was less than  
626 20%, and no complete sequence in any portion of the viral genome was detected, including in the  
627 spike gene encoding the S1 subunit identified by protein analysis in these patients.

628

629

630

631

632

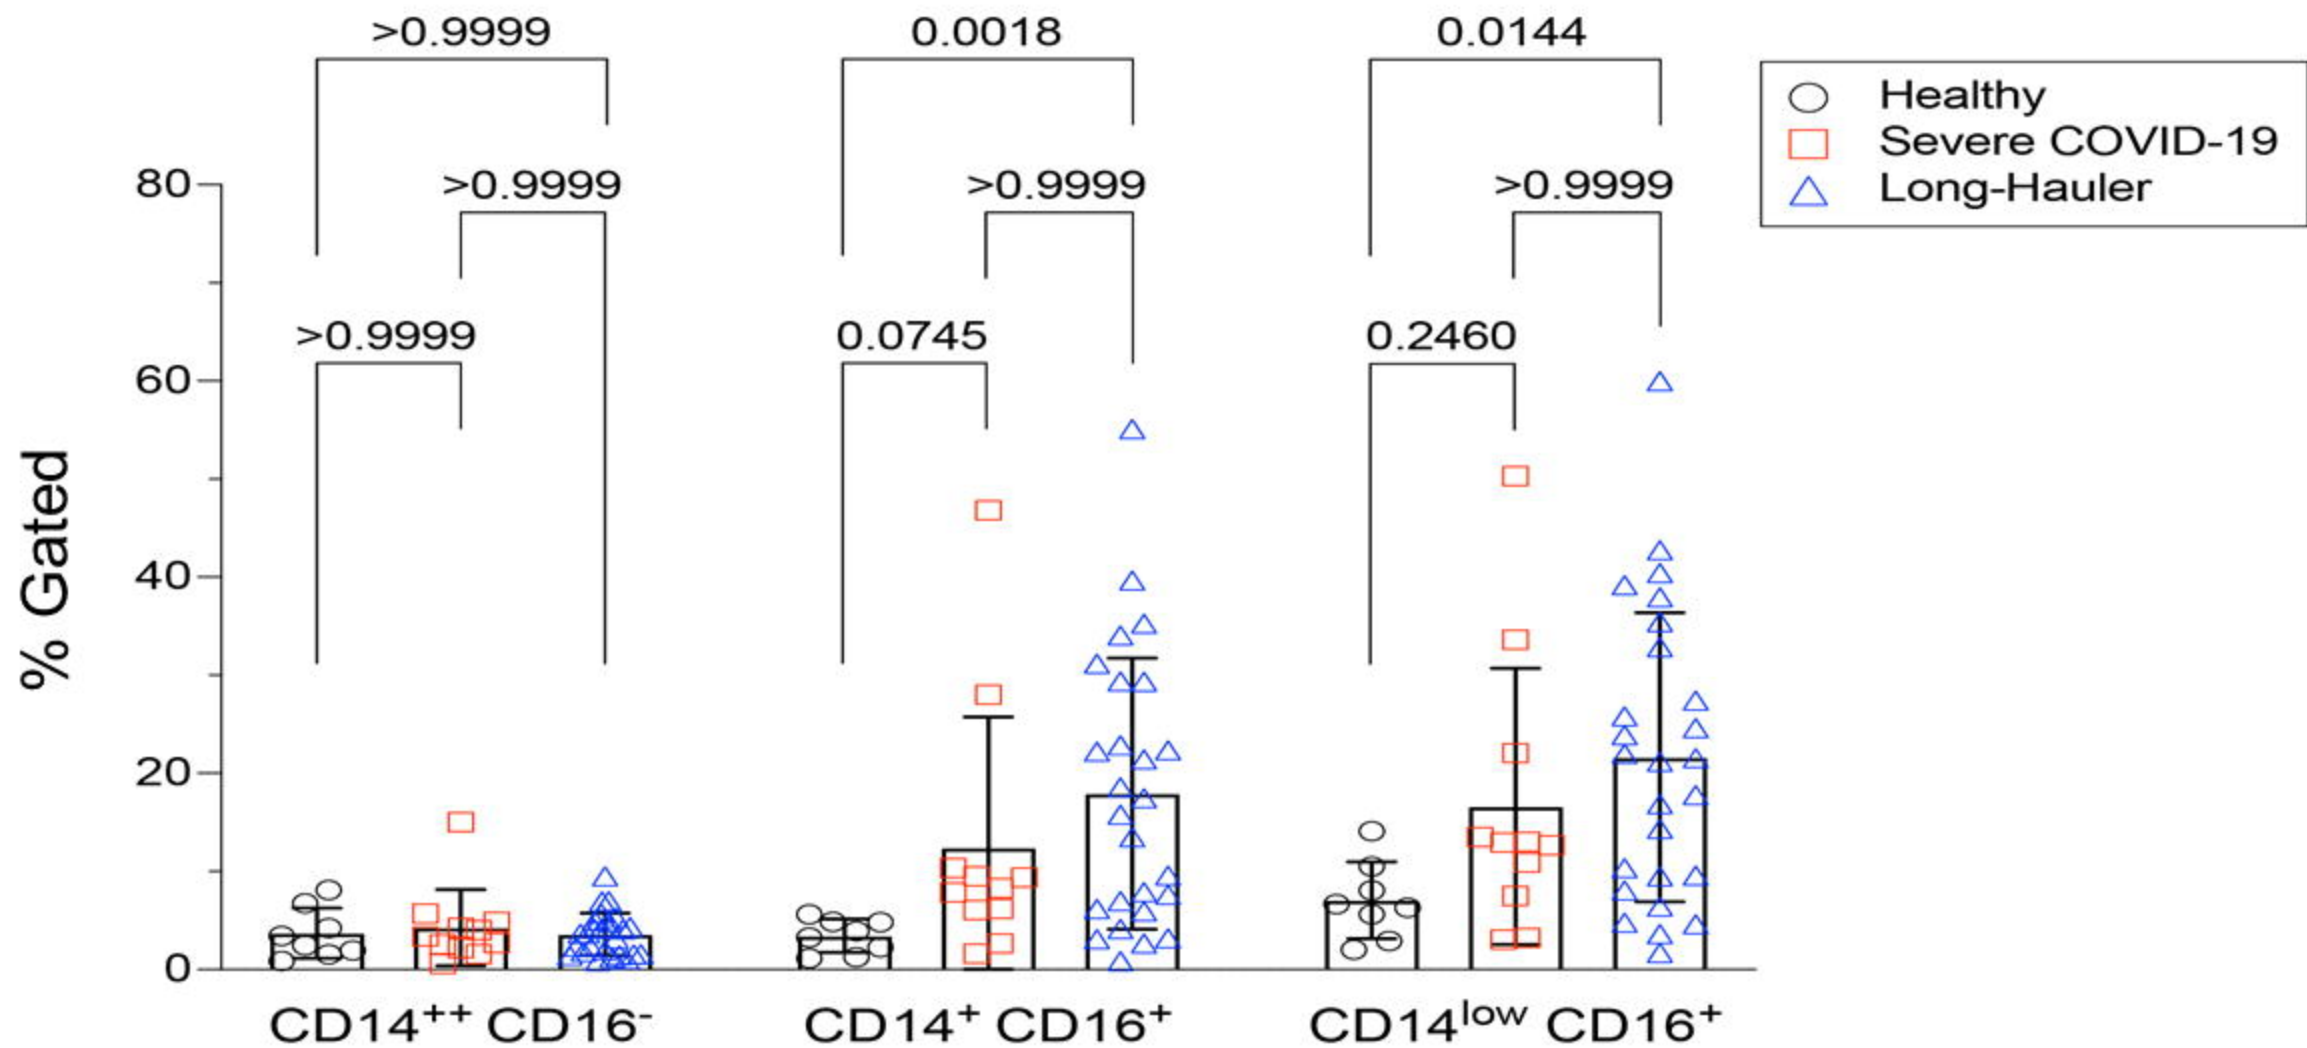



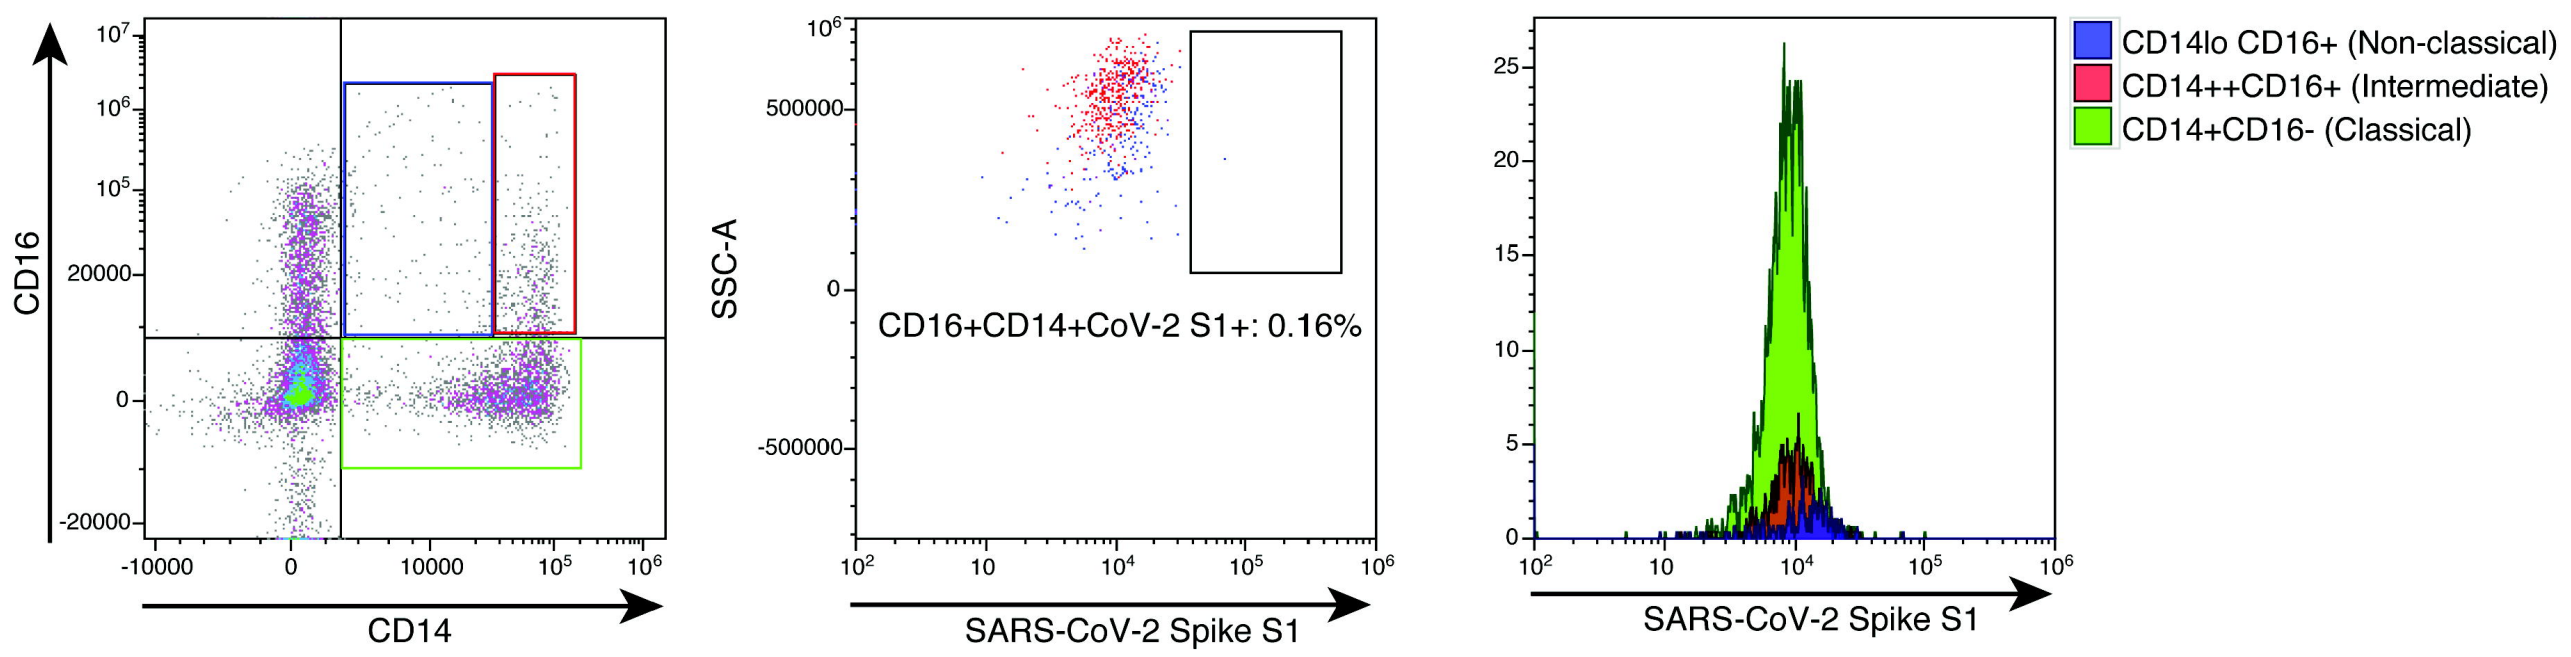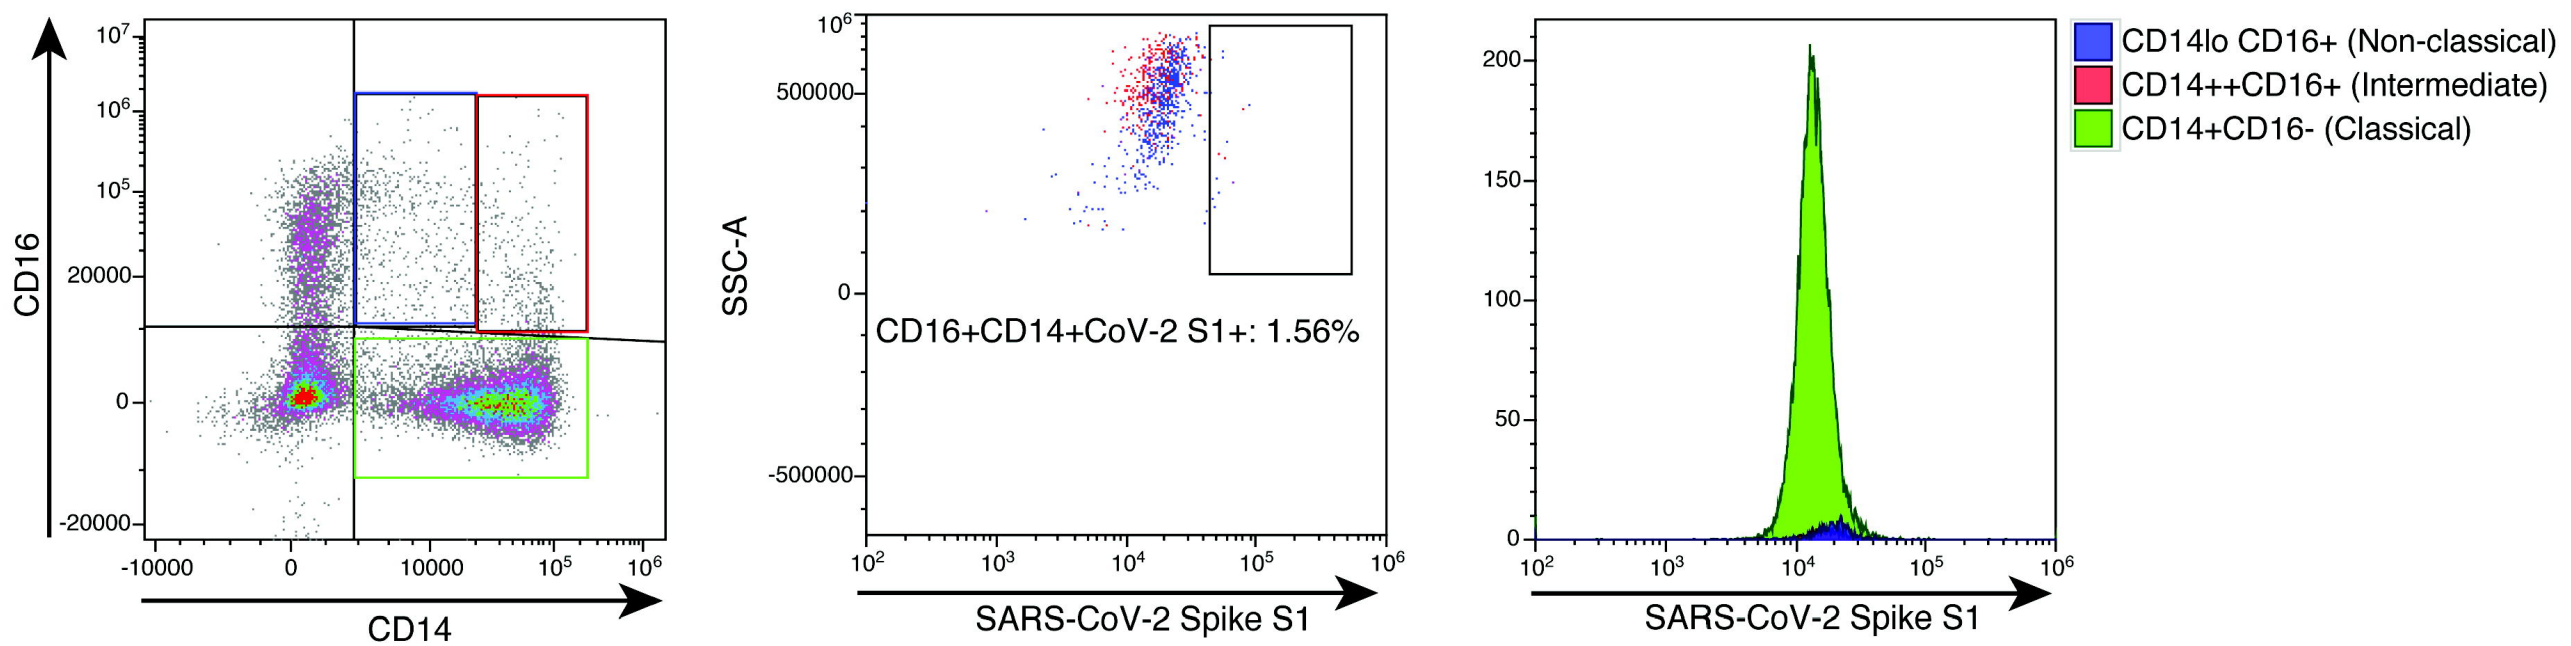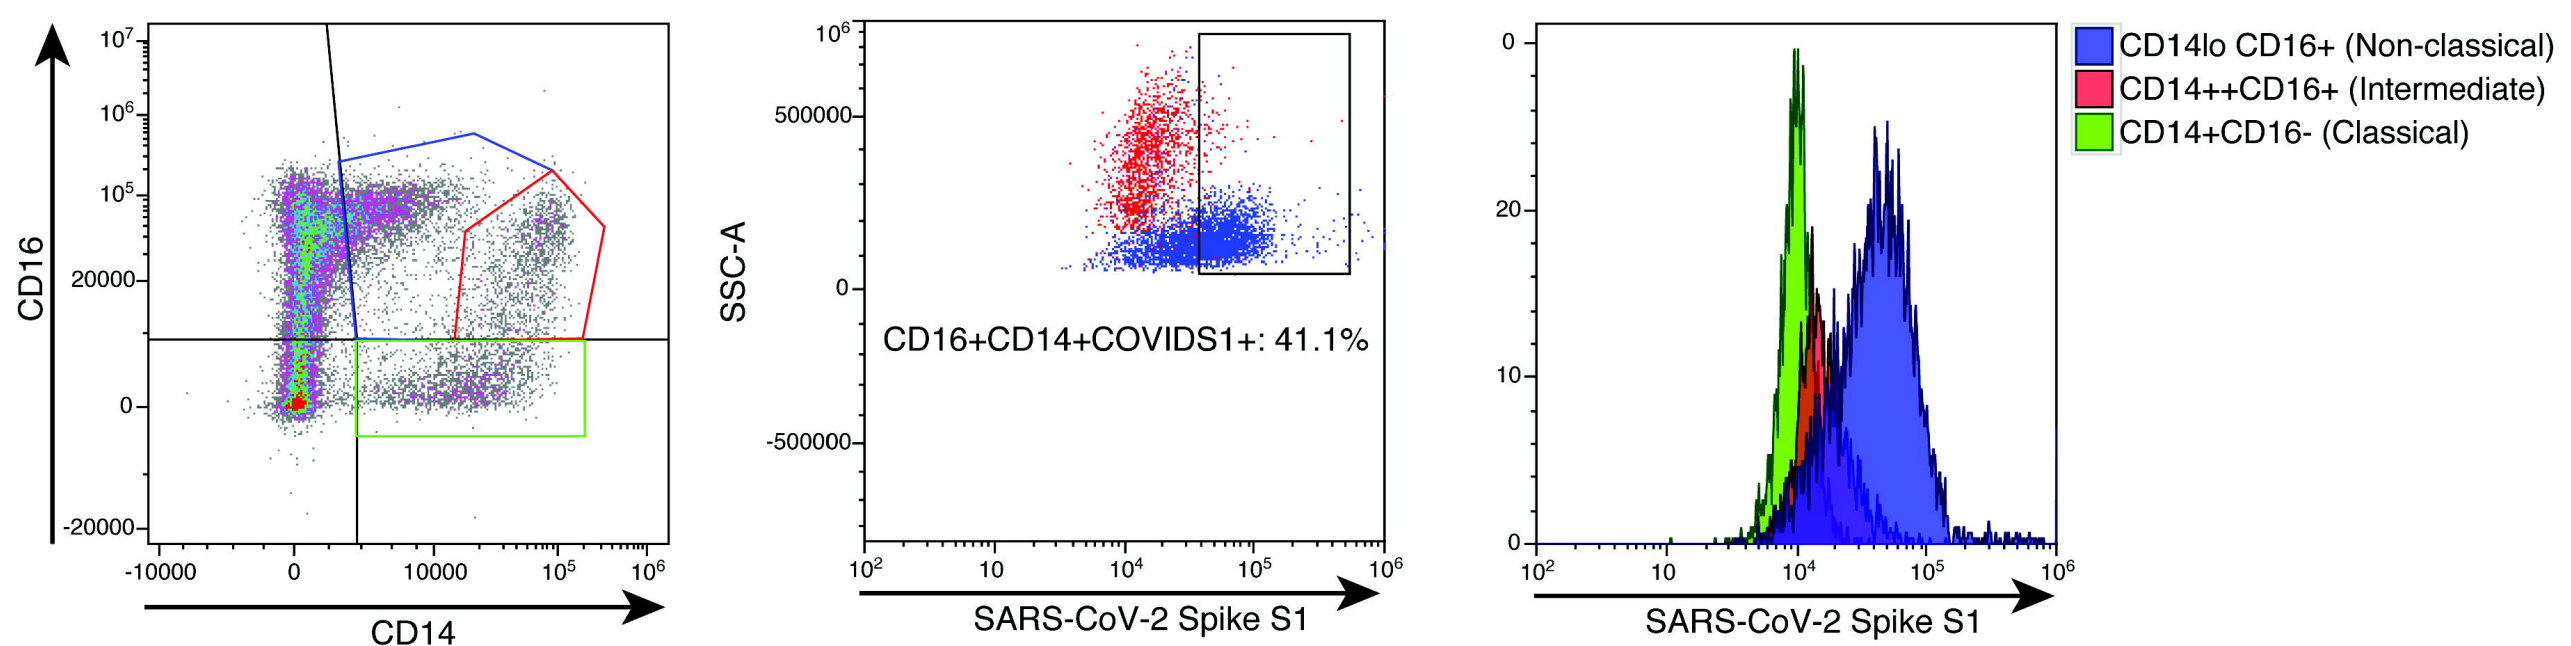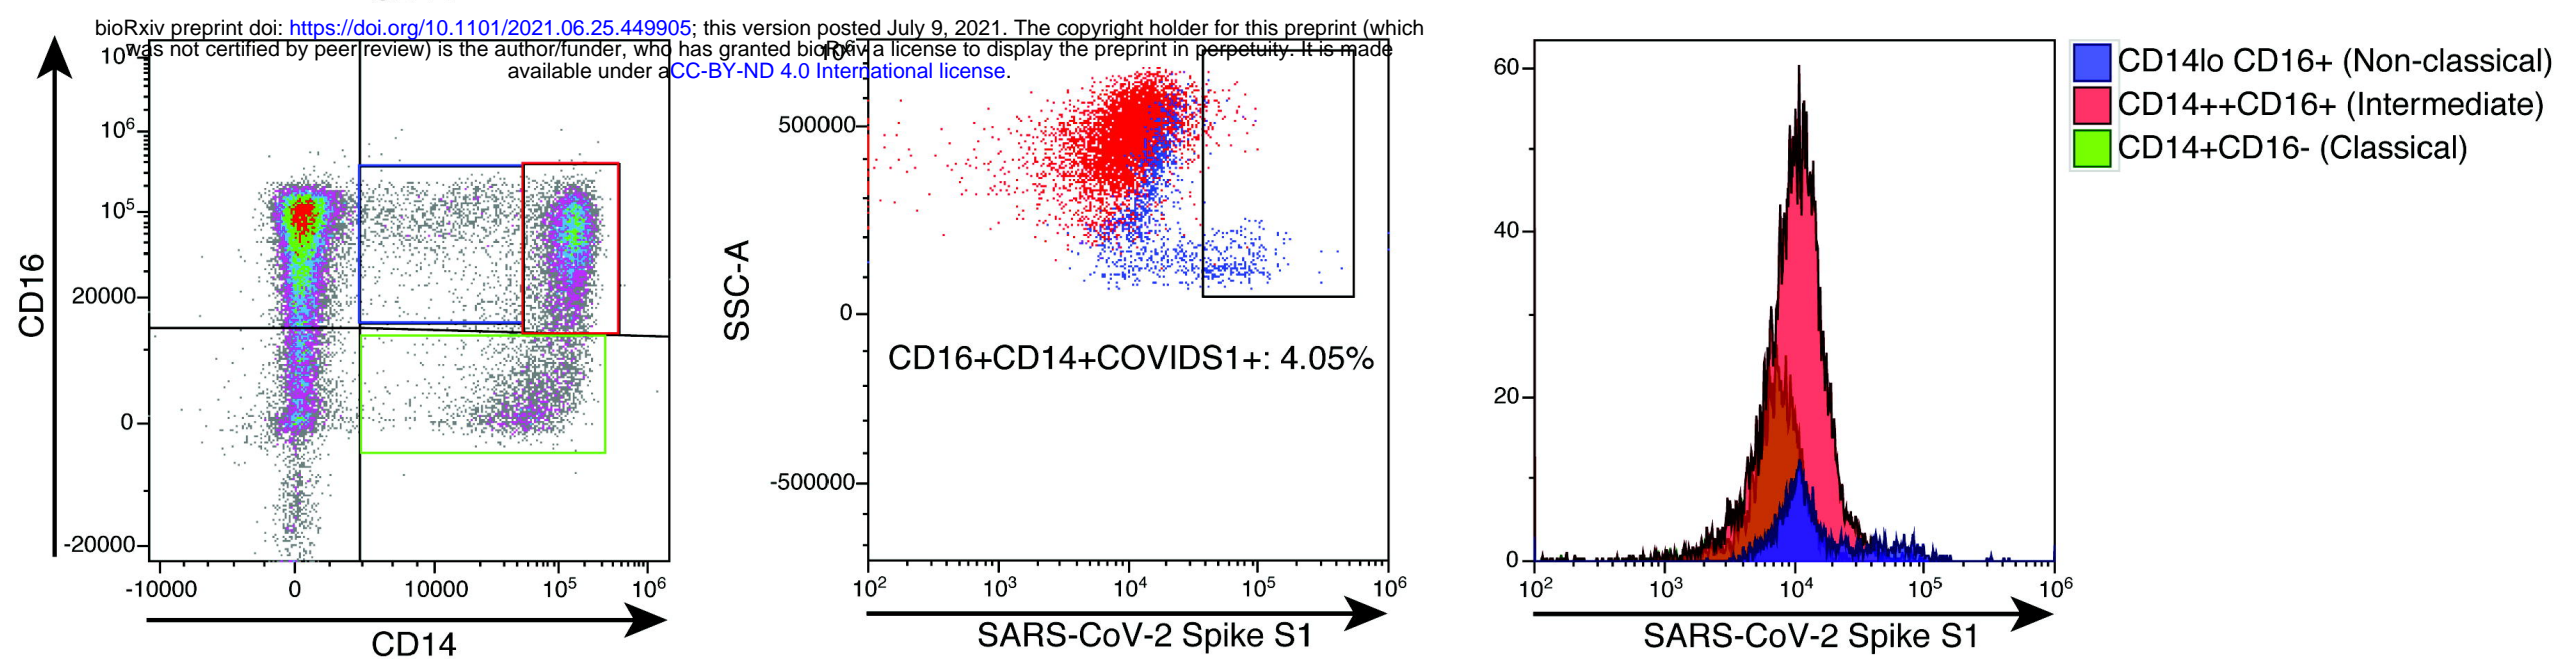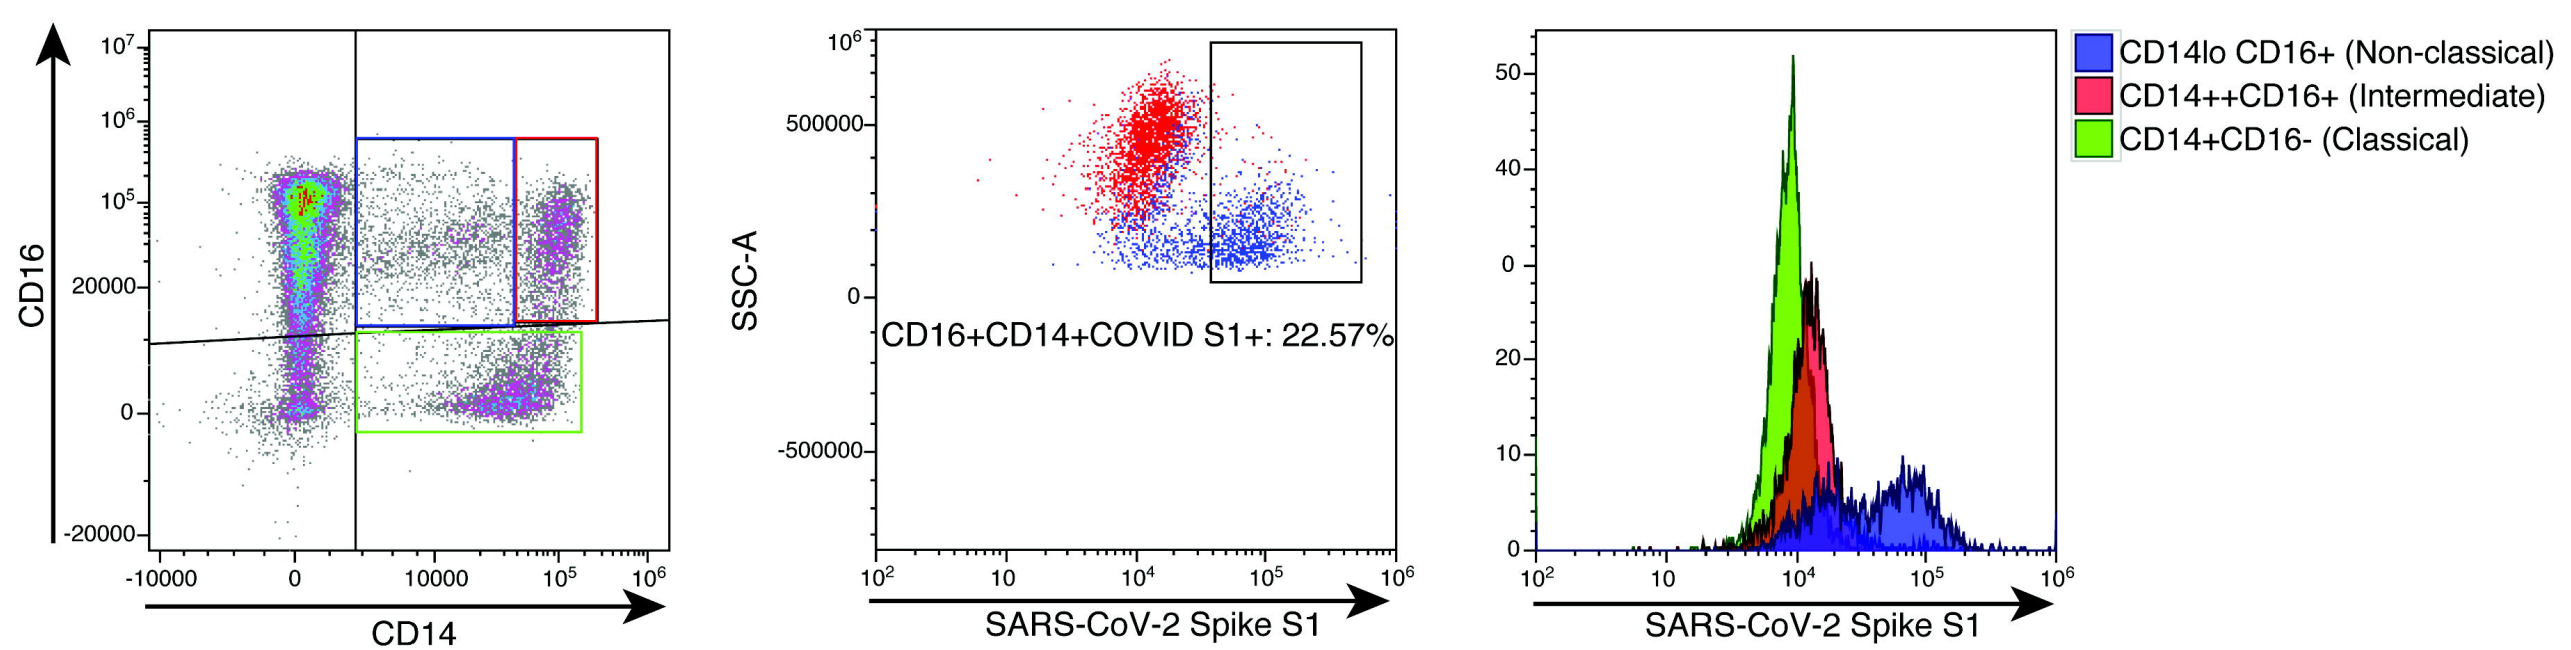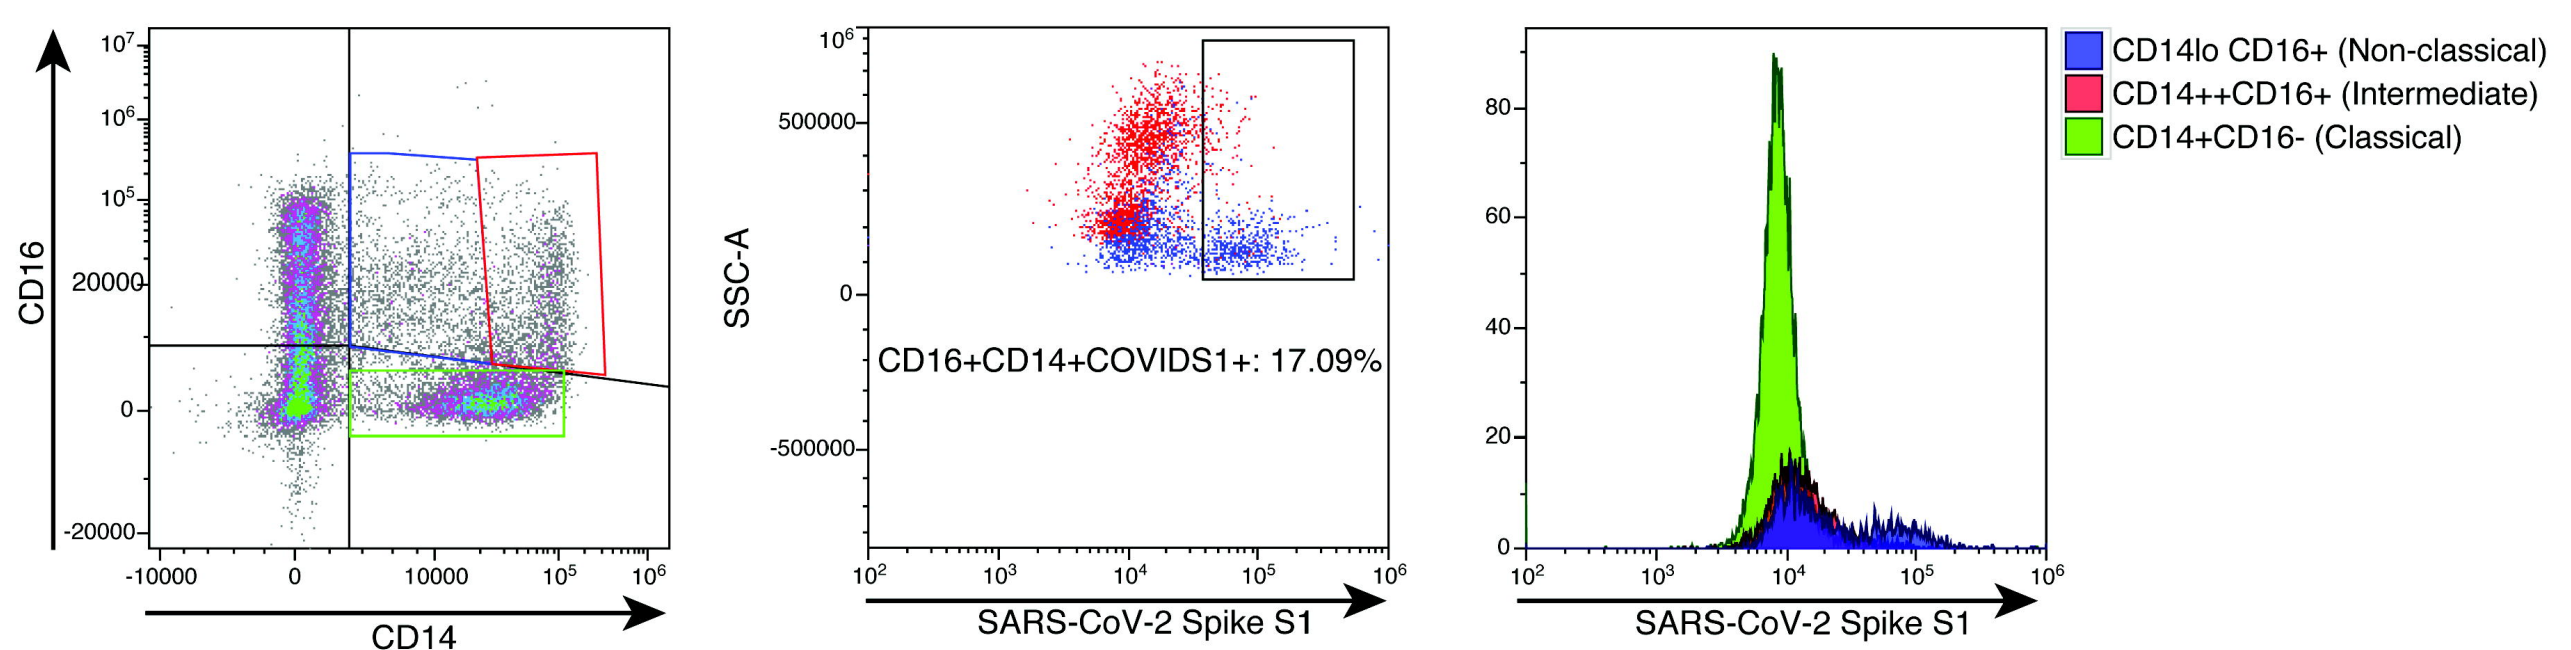



A

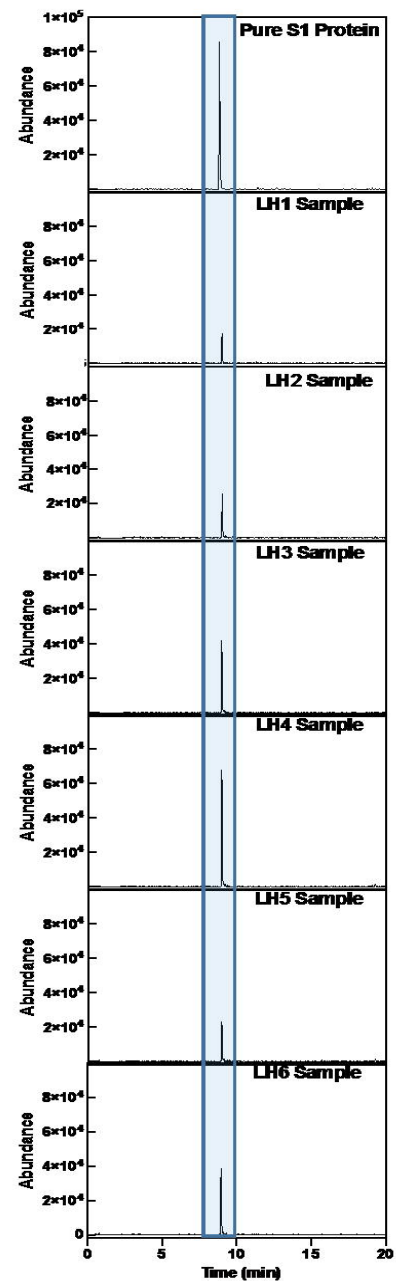

B

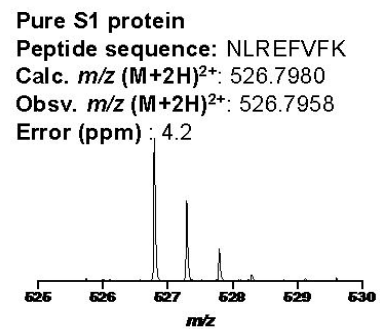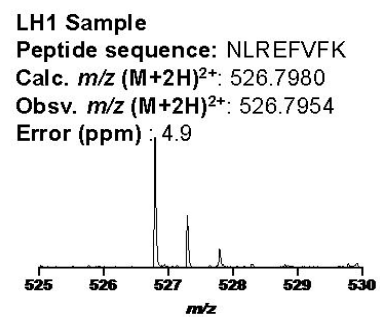



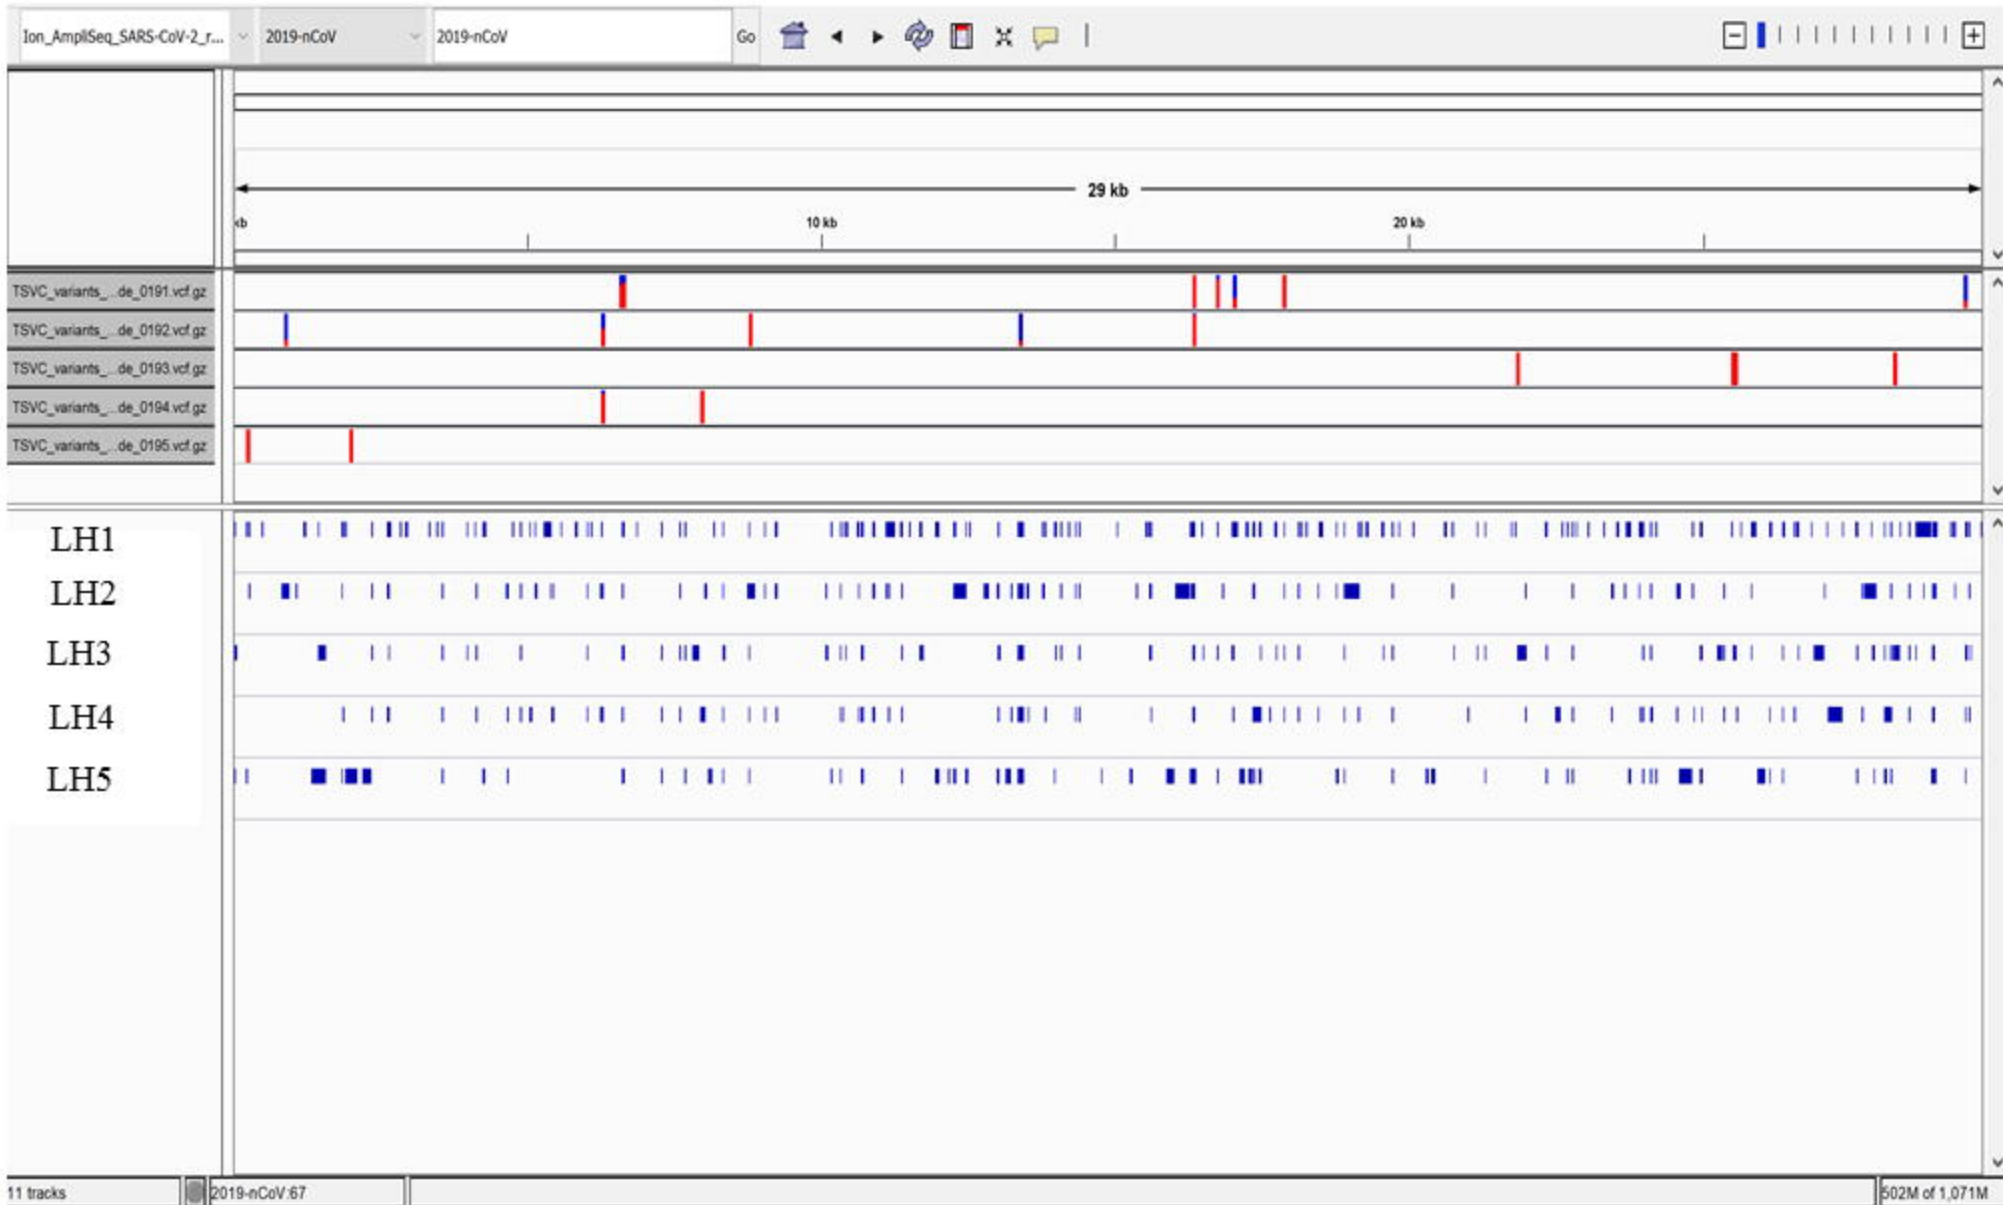

Source: https://www.biorxiv.org/content/10.1101/2021.06.25.449905v2.full.pdf
